# Supplementary material for: Trends in inequalities in Children Looked After in England between 2004 and 2019: a local area ecological analysis
Source: HighWire-hosted journal article supplement (doi:10.1136/bmjopen-2020-041774), 2020-11-01

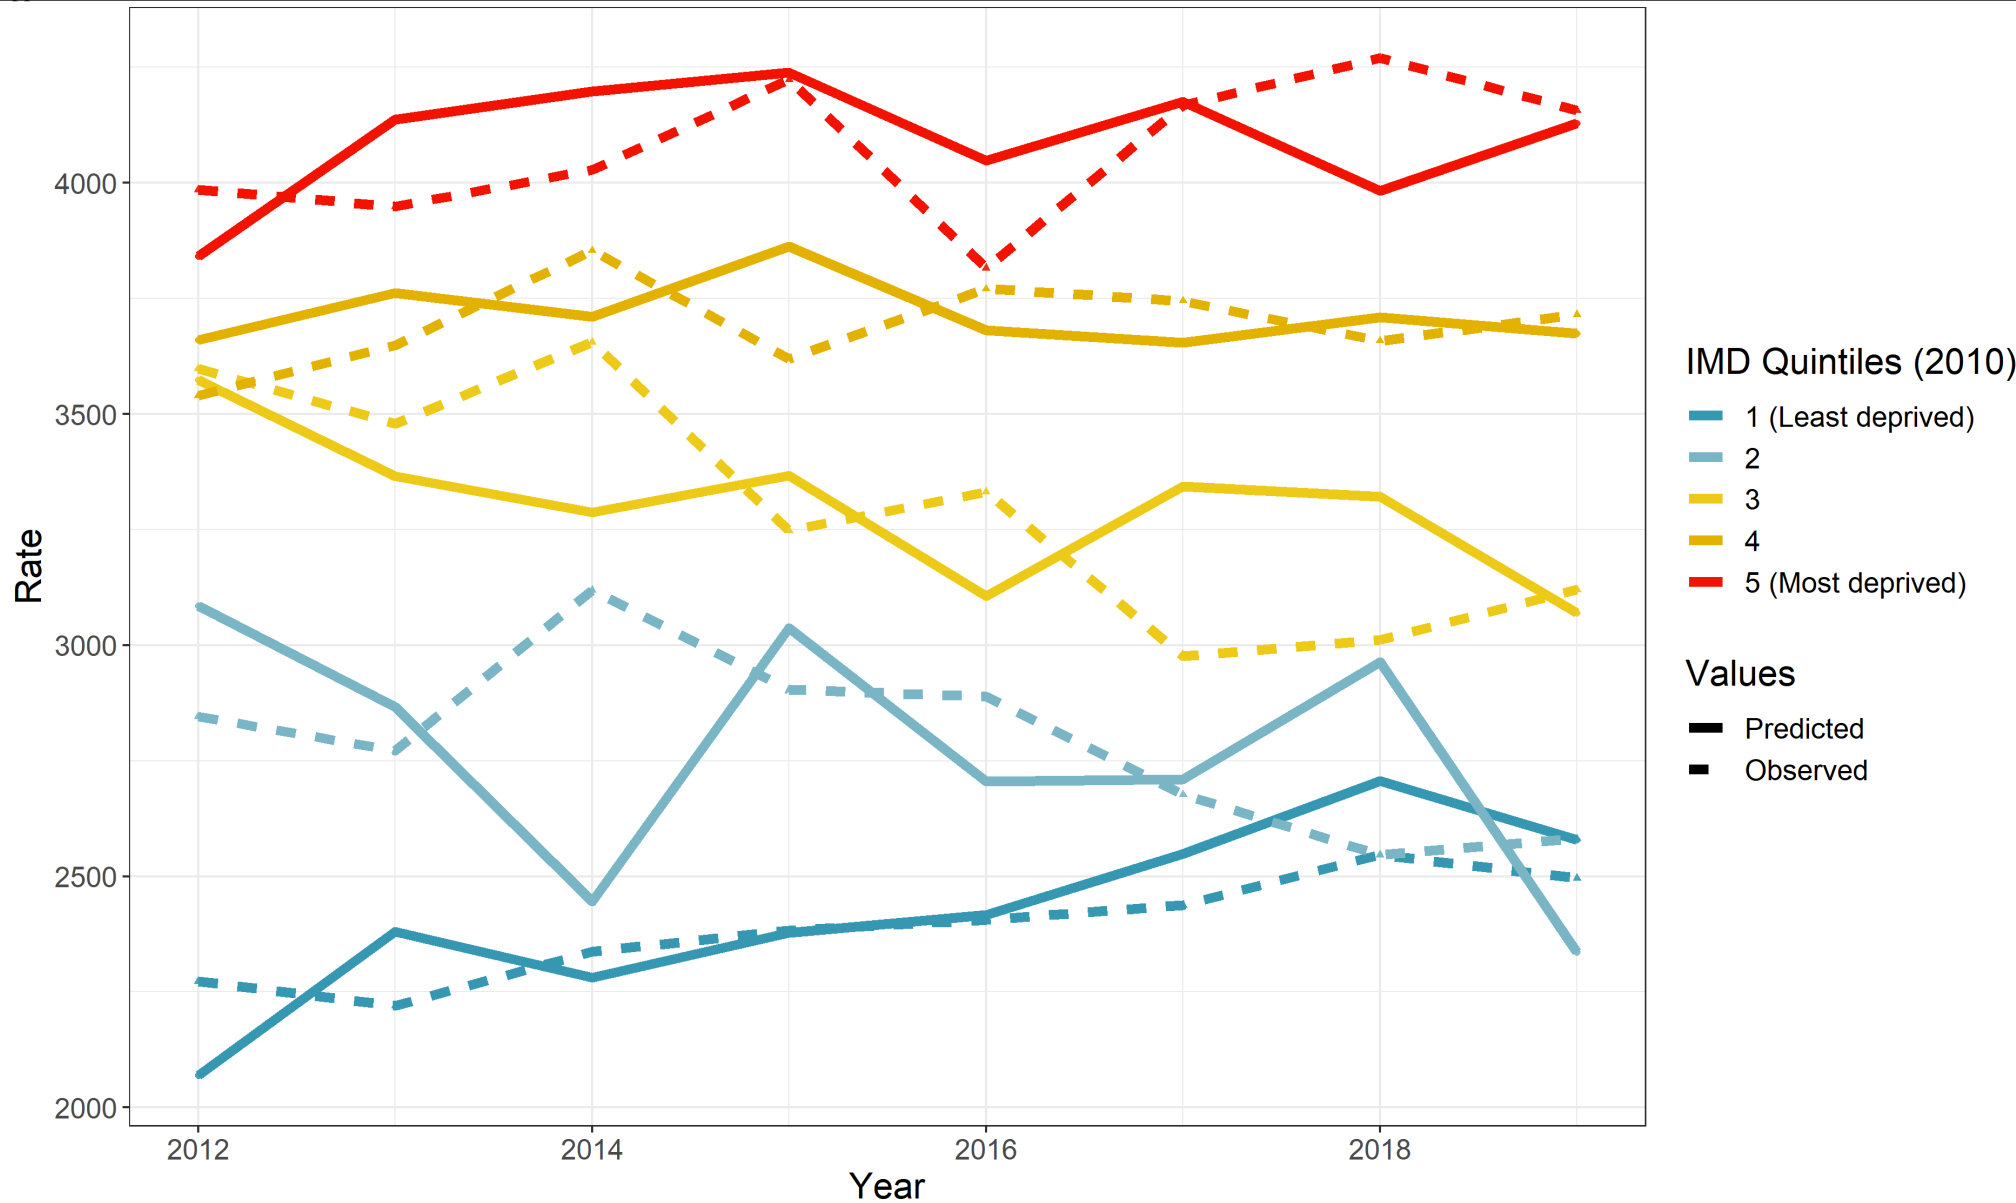

Supplement: bmjopen-2020-041774supp018_data_supplement.pdf [file bmjopen-2020-041774supp018_data_supplement.pdf]
